# Supplementary material for: Nonstoichiometric Cu2−xSe nanocrystals in situ produced on the surface of carbon nanotubes for ablation of tumor cells
Source: Royal Society of Chemistry journal article supplement (doi:10.1039/c5nj03379a), 2016-01-01
Supplement: c5nj03379a1.pdf [file c5nj03379a1.pdf]

## Electronic Supporting Information

*for*

### **Nonstoichiometric $\text{Cu}_{2-x}\text{Se}$ nanocrystals in situ produced on the surface of carbon nanotubes for ablation of tumor cells**

Qiang Wang,<sup>a</sup> Wen Long Li,<sup>b</sup> Hong Yan Zou,<sup>b</sup> Hui Liu<sup>\*a</sup> and Cheng Zhi Huang<sup>\*ab</sup>

*<sup>a</sup>Key Laboratory of Luminescence and Real-Time Analytical Chemistry (Southwest University), Ministry of Education, College of Pharmaceutical Science, Southwest University, Chongqing, 400715, P. R. China.*

*<sup>b</sup>College of Chemistry and Chemical Engineering, Southwest University C, Chongqing 400716, China*

*\*Corresponding author: [chengzhi@swu.edu.cn](mailto:chengzhi@swu.edu.cn)*

| Sample  | Cu 2p <sub>3/2</sub> (eV) | Cu 2p <sub>1/2</sub> (eV) |
|---------|---------------------------|---------------------------|
| Initial | 932.1                     | 951.9                     |
| 15 min  | 932.3                     | 952.0                     |
| 1 h     | 932.5                     | 952.2                     |
| 4 h     | 932.8                     | 952.6                     |
| CuSe    | 932.9                     | 952.8                     |

**Table. S1** The peaks of Cu 2p<sub>3/2</sub> and Cu 2p<sub>1/2</sub> XPS spectra compared with the typical values in CuSe NPs at different reaction stage.

| Nanocrystal               | k         | (E <sub>1cm</sub> <sup>1%</sup> ) | λ <sub>LSPR</sub> (nm) |
|---------------------------|-----------|-----------------------------------|------------------------|
| CNTs                      | k= 0.1584 | 1.289                             | 980 nm                 |
| Cu <sub>2-x</sub> Se NPs  | k= 0.2121 | 1.765                             | 980 nm                 |
| Cu <sub>2-x</sub> Se/CNTs | k= 0.2776 | 1.921                             | 980 nm                 |

**Table. S2** The absorption coefficient of CNTs, Cu<sub>2-x</sub>Se NPs and Cu<sub>2-x</sub>Se/CNTs at 980 nm.

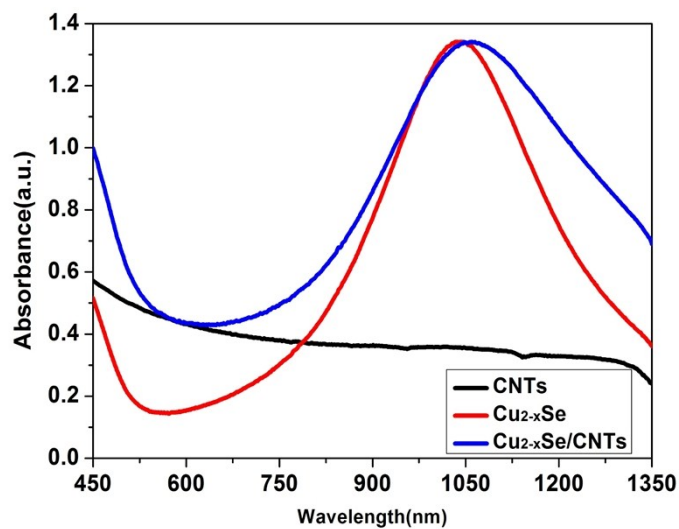

**Fig. S1** The UV-vis-NIR spectra of CNTs, Cu<sub>2-x</sub>Se NPs and Cu<sub>2-x</sub>Se/CNTs nanohybrids.

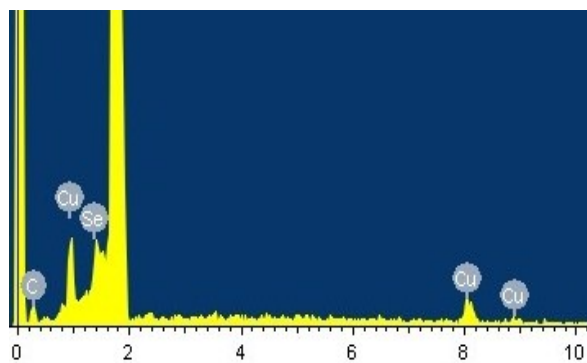

**Fig. S2** The elemental analysis of Cu<sub>2-x</sub>Se/CNTs nanohybrids in intracellular.

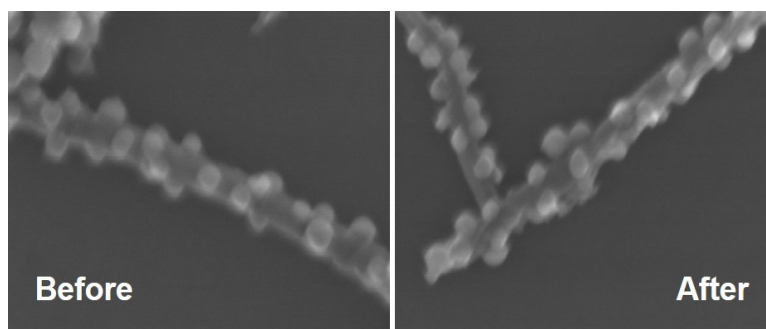

**Fig. S3** The SEM images of Cu<sub>2-x</sub>Se/CNTs nanohybrids treated with or without ultrasound for 1h.
